# Supplementary material for: Using Popular Foods Consumed to Inform Development of Digital Tools for Dietary Assessment and Monitoring
Source: MDPI journal article supplement (doi:10.3390/nu14224822), 2022-11-14
Supplement: s1 [file s1]

**Table S1:** The 100 most popular foods in Australia by energy contribution when categorised by minor food groups

| #  | Minor food groups                                                               | Observations (n) | Energy (%) | Cumulative Energy (%) |
|----|---------------------------------------------------------------------------------|------------------|------------|-----------------------|
| 1  | Savoury pasta/noodle and sauce dishes, saturated fat $\leq 5$ g/100 g           | 1626             | 3.2        | 3.2                   |
| 2  | Milk, cow, fluid, regular whole, full fat                                       | 8710             | 2.8        | 6.0                   |
| 3  | Breads, and bread rolls, white, mandatorily fortified                           | 3948             | 2.7        | 8.6                   |
| 4  | Rice and rice grain fractions                                                   | 1836             | 2.2        | 10.8                  |
| 5  | Chicken                                                                         | 2204             | 2.1        | 12.9                  |
| 6  | Beef                                                                            | 1452             | 1.7        | 14.6                  |
| 7  | Potato products                                                                 | 1674             | 1.6        | 16.2                  |
| 8  | Savoury pastry products, pies, rolls and envelopes                              | 1066             | 1.6        | 17.8                  |
| 9  | Beers, > 3.5% alcohol                                                           | 1113             | 1.5        | 19.4                  |
| 10 | Poultry crumbed, battered, meatloaf or patty type with cereal and/or vegetables | 969              | 1.5        | 20.9                  |
| 11 | Breads, and bread rolls, white, not stated as to fortification                  | 1914             | 1.4        | 22.3                  |
| 12 | Burgers, saturated fat $\leq 5$ g/100 g                                         | 634              | 1.4        | 23.7                  |
| 13 | Pizza, saturated fat $\leq 5$ g/100 g                                           | 550              | 1.4        | 25.1                  |
| 14 | Sausage, saturated fat content >5 g/100g                                        | 792              | 1.2        | 26.3                  |
| 15 | Cakes and cake mixes, other types                                               | 820              | 1.2        | 27.5                  |
| 16 | Potatoes                                                                        | 2041             | 1.1        | 28.6                  |
| 17 | Apples                                                                          | 3010             | 1.1        | 29.7                  |
| 18 | Cheese, hard cheese ripened styles                                              | 2440             | 1.1        | 30.9                  |
| 19 | Milk, cow, fluid, reduced fat, <2 g/100g                                        | 5662             | 1.1        | 32.0                  |
| 20 | Wines, red (including sparkling varieties and rose styles)                      | 899              | 1.1        | 33.0                  |
| 21 | Breakfast cereal, mixed grain, with fruit and/or nuts                           | 784              | 1.1        | 34.1                  |
| 22 | Soft drinks, cola                                                               | 1467             | 1.0        | 35.1                  |
| 23 | Coffee beverage, prepared with milk or milk substitute                          | 2115             | 1.0        | 36.2                  |
| 24 | Wines, white (including sparkling varieties)                                    | 875              | 1.0        | 37.2                  |
| 25 | Sugar                                                                           | 8052             | 1.0        | 38.2                  |
| 26 | Breakfast cereal, wheat based, fortified, sugars $\leq 20$ g/100g               | 1586             | 1.0        | 39.2                  |
| 27 | Beef dishes with gravy, sauce or vegetables                                     | 623              | 1.0        | 40.1                  |
| 28 | Poultry dishes, with gravy, sauce or vegetables                                 | 550              | 1.0        | 41.1                  |
| 29 | Porridge style, oat based                                                       | 899              | 0.9        | 42.0                  |
| 30 | Bananas                                                                         | 2446             | 0.9        | 42.9                  |
| 31 | Ice cream, tub varieties, fat content >10 g/100 g                               | 1039             | 0.9        | 43.8                  |
| 32 | Breads, and bread rolls, mixed grain, mandatorily fortified                     | 1347             | 0.9        | 44.7                  |
| 33 | Sandwiches and filled rolls, saturated fat $\leq 5$ g/100 g                     | 459              | 0.9        | 45.6                  |

|    |                                                                               |      |     |      |
|----|-------------------------------------------------------------------------------|------|-----|------|
| 34 | Breads, and bread rolls, wholemeal and brown, mandatorily fortified           | 1441 | 0.9 | 46.5 |
| 35 | Lamb and mutton                                                               | 687  | 0.9 | 47.3 |
| 36 | Savoury rice-based dishes, saturated fat $\leq 5$ g/100 g                     | 442  | 0.8 | 48.2 |
| 37 | Potato crisps                                                                 | 1004 | 0.8 | 49.0 |
| 38 | Soft drinks, non-cola                                                         | 1376 | 0.8 | 49.7 |
| 39 | Muffins, cake type, and muffin mixes                                          | 359  | 0.8 | 50.5 |
| 40 | Fruit drinks (ready to drink or made from concentrate)                        | 1401 | 0.7 | 51.2 |
| 41 | Sweet biscuits, plain or flavoured including short bread varieties            | 1722 | 0.7 | 52.0 |
| 42 | Chocolate (plain, unfilled varieties)                                         | 952  | 0.7 | 52.7 |
| 43 | Fruit juices, commercially prepared                                           | 1881 | 0.7 | 53.4 |
| 44 | Finfish, battered or crumbed                                                  | 441  | 0.7 | 54.1 |
| 45 | Chocolate-based confectionery with other fillings or additions                | 894  | 0.7 | 54.8 |
| 46 | Soup containing meat, poultry or seafood                                      | 666  | 0.7 | 55.5 |
| 47 | Other nuts and nut products and dishes                                        | 929  | 0.7 | 56.2 |
| 48 | Cakes and cake mixes, chocolate                                               | 378  | 0.7 | 56.9 |
| 49 | Pork                                                                          | 551  | 0.7 | 57.5 |
| 50 | Finfish, fresh, frozen                                                        | 575  | 0.6 | 58.2 |
| 51 | Butter                                                                        | 2449 | 0.6 | 58.8 |
| 52 | Eggs, chicken                                                                 | 1467 | 0.6 | 59.4 |
| 53 | Cordials, made from concentrate                                               | 857  | 0.6 | 60.0 |
| 54 | Breads, and bread rolls, mixed grain, not stated as to fortification          | 719  | 0.6 | 60.6 |
| 55 | Breads, and bread rolls, wholemeal, not stated as to fortification            | 796  | 0.6 | 61.1 |
| 56 | Salads, vegetable based                                                       | 2130 | 0.6 | 61.7 |
| 57 | Pasta and noodles, wheat based, other than instant noodles                    | 467  | 0.6 | 62.3 |
| 58 | Milk, coffee/chocolate flavoured and milk-based drinks, full fat              | 387  | 0.5 | 62.8 |
| 59 | Egg dishes, savoury                                                           | 592  | 0.5 | 63.3 |
| 60 | Savoury biscuits, wheat based, plain, energy $>1800$ kJ per 100 g             | 861  | 0.5 | 63.9 |
| 61 | Poultry dishes, with gravy, sauce or vegetables, added pasta, noodles or rice | 243  | 0.5 | 64.3 |
| 62 | Flat breads (e.g. Pita bread), wheat based                                    | 554  | 0.5 | 64.8 |
| 63 | Breakfast cereal, mixed grain, with fruit and/or nuts, fortified              | 557  | 0.5 | 65.3 |
| 64 | Pizza, saturated fat $>5$ g/100 g                                             | 182  | 0.4 | 65.7 |
| 65 | Lollies and other confectionery, sugar sweetened                              | 1239 | 0.4 | 66.2 |
| 66 | Soup, vegetable only                                                          | 619  | 0.4 | 66.6 |
| 67 | Instant noodles and noodle products, wheat based                              | 291  | 0.4 | 67.0 |
| 68 | Sweet breads, buns and scrolls, uniced, unfilled                              | 456  | 0.4 | 67.5 |

|     |                                                                               |      |     |      |
|-----|-------------------------------------------------------------------------------|------|-----|------|
| 69  | Bacon                                                                         | 644  | 0.4 | 67.9 |
| 70  | Other fruit                                                                   | 1794 | 0.4 | 68.3 |
| 71  | Potato mixed dishes                                                           | 444  | 0.4 | 68.7 |
| 72  | Mayonnaise and cream-style dressings, full fat                                | 853  | 0.4 | 69.0 |
| 73  | Beers, 1.15- 3.5% alcohol, reduced alcohol / light                            | 346  | 0.4 | 69.4 |
| 74  | Sweet biscuits, chocolate-coated, chocolate chip                              | 536  | 0.4 | 69.8 |
| 75  | Cheese, not further defined                                                   | 770  | 0.4 | 70.2 |
| 76  | Monounsaturated margarine spreads, fat content $\geq 65$ g/100g               | 1774 | 0.4 | 70.5 |
| 77  | Packed finfish                                                                | 652  | 0.4 | 70.9 |
| 78  | Sweet biscuits, cream-filled                                                  | 521  | 0.3 | 71.2 |
| 79  | Chocolate-based confectionery with nut fillings or additions                  | 436  | 0.3 | 71.6 |
| 80  | Slices, biscuit and cake-type                                                 | 263  | 0.3 | 71.9 |
| 81  | Lamb or mutton dishes with gravy, sauce or vegetables                         | 160  | 0.3 | 72.2 |
| 82  | Salads, vegetable based, added meat, fish or eggs                             | 534  | 0.3 | 72.6 |
| 83  | Yoghurt, flavoured or added fruit, reduced fat                                | 587  | 0.3 | 72.9 |
| 84  | Savoury biscuits, wheat based, plain, energy $\leq 1800$ kJ per 100 g         | 760  | 0.3 | 73.2 |
| 85  | Yoghurt, flavoured or added fruit, full fat                                   | 557  | 0.3 | 73.5 |
| 86  | Mixed nuts or nuts and seeds                                                  | 270  | 0.3 | 73.8 |
| 87  | Burgers, saturated fat $> 5$ g/100 g                                          | 177  | 0.3 | 74.1 |
| 88  | Vegetables and sauce                                                          | 274  | 0.3 | 74.5 |
| 89  | Mixtures of two or more vegetables                                            | 1251 | 0.3 | 74.8 |
| 90  | Beef, crumbed, battered, meatloaf or patty type with cereal and/or vegetables | 298  | 0.3 | 75.1 |
| 91  | Beef dishes, added pasta, noodles or rice                                     | 160  | 0.3 | 75.4 |
| 92  | Spirits                                                                       | 278  | 0.3 | 75.6 |
| 93  | Pears                                                                         | 669  | 0.3 | 75.9 |
| 94  | Savoury pastry products, pies, rolls and envelopes, fried                     | 204  | 0.3 | 76.2 |
| 95  | Honey and sugar syrups                                                        | 1269 | 0.3 | 76.5 |
| 96  | Milk, cow, fluid, skim, non-fat                                               | 2326 | 0.3 | 76.8 |
| 97  | Muesli and cereal style bars, with fruit and/or nuts                          | 443  | 0.3 | 77.1 |
| 98  | Pre-mixed drinks, cola- or energy-drink based                                 | 121  | 0.3 | 77.4 |
| 99  | Cakes and cake mixes, sponge                                                  | 237  | 0.3 | 77.7 |
| 100 | Other fruiting vegetables                                                     | 1815 | 0.3 | 77.9 |
